# Supplementary material
Source: PubMed Central journal article supplement (PMC8387289)
Supplement: mmc1.pdf [file mmc1.pdf]

**Supplemental information**

**Optical genome mapping enables constitutional  
chromosomal aberration detection**

**Tuomo Mantere, Kornelia Neveling, Céline Pebrel-Richard, Marion Benoist, Guillaume van der Zande, Ellen Kater-Baats, Imane Baatout, Ronald van Beek, Tony Yammine, Michiel Oorsprong, Faten Hsoumi, Daniel Olde-Weghuis, Wed Majdali, Susan Vermeulen, Marc Pauper, Aziza Lebbar, Marian Stevens-Kroef, Damien Sanlaville, Jean Michel Dupont, Dominique Smeets, Alexander Hoischen, Caroline Schluth-Bolard, and Laïla El Khattabi**

## Supplemental Data Description

Supplemental Data includes 12 figures and 7 tables.

**Figure S1.** Workflow of optical genome mapping technique.

**Figure S2.** Visual representation of optical genome mapping data.

**Figure S3.** Potential mapping artifacts.

**Figure S4.** Representative example of fragmented CNVs.

**Figure S5.** Representation of different chromosomal abnormalities.

**Figure S6.** Representative CNV profiles obtained with optical genome mapping, for different samples.

**Figure S7.** Isodicentric Y-chromosomes.

**Figure S8.** Optical genome mapping and CNV-microarray profiles for isochromosomes 15 and X.

**Figure S9.** Small ring chromosome X.

**Figure S10.** Optical genome mapping breakpoint detection for translocation  $t(9;17)(p13;q21)$ , disrupting the gene *KANSL1*.

**Figure S11.** Complex sample 52.

**Figure S12.** Complex sample 55.

**Table S1.** Comparison of previous diagnostic findings with optical genome mapping results.

**Table S2.** Technical performance of optical genome mapping.

**Table S3.** Overall numbers of variants per sample.

**Table S4.** SV and CNV statistics per size range.

**Table S5.** Detection rate of chromosomal aberrations, by each pipeline, according to their type.

**Table S6.** Comparison of capabilities and limitations of optical genome mapping versus conventional cytogenetic methods, karyotyping and CNV-microarray, in detecting different types of chromosomal aberrations.

**Table S7.** Concordance of all filtered SVs and CNVs between optical genome mapping and CNV-microarray

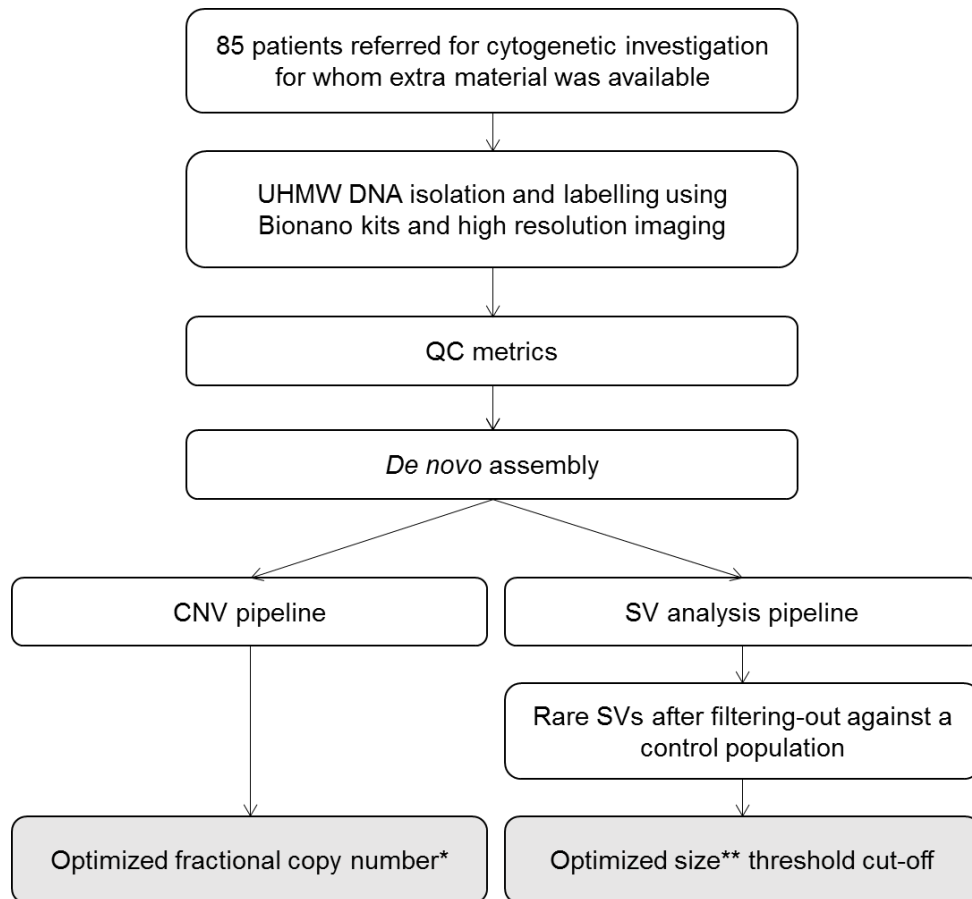

**Figure S1. Workflow of optical genome mapping technique.**

For this study, 85 samples for whom extra material was available were included. Ultra-high molecular weight DNA was extracted using the Bionano solution phase DNA isolation method. Labeling was done using the DLE-1 chemistry. High resolution imaging of DNA molecules was done on Bionano Saphyr instruments. As different centers were included, different amount of data was produced (~800Gbp for Radboud UMC, ~300Gbp for the French centers), and samples were analyzed using different software versions (3.4.1 and 3.5). A *de novo* assembly was performed, and both SVs and CNVs were called.

Grey boxes are optional steps to reduce the number of calls without losing sensitivity for clinically relevant aberrations. \*FCN  $\leq 1.2$  for losses and  $\geq 2.8$  for gains, \*\*recommended SV pipeline size cut-off = 20 Kb

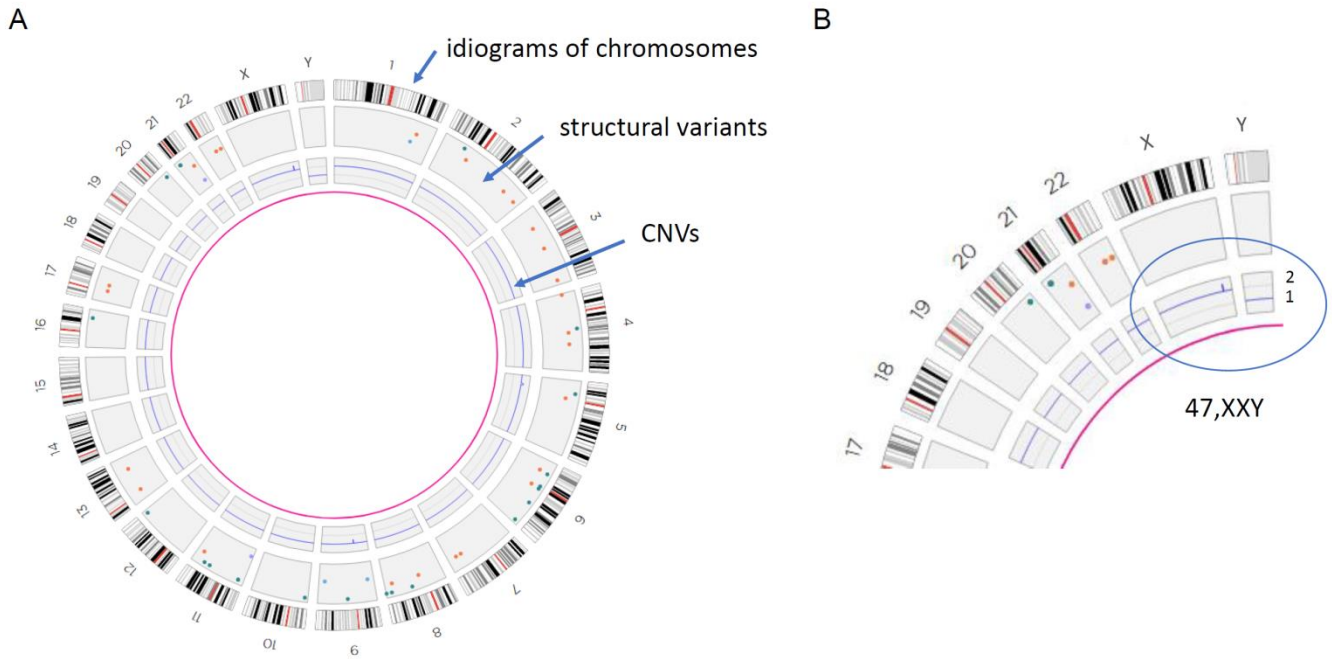

**Figure S2. Visual representation of optical genome mapping data.**

A) Genome-wide circos plot showing all 24 chromosomes in a circular way. For each chromosome, the ideograms are shown at the outside of the circosplot, with ideogram-style chromosomal banding and the centromeres in red. Different colored dots in the boxes underneath represent different called SVs. The blue line in the box underneath represents the CNV profile, with each peak representing a CNV call. B) Part of a circos plot, showing the sex chromosomes. The blue CNV line shows two copies of chromosome X, as for autosomes, and one copy of chromosome Y consistent with a sex chromosome aneuploidy (47,XXY, resulting in Klinefelter syndrome).

### A) Intrachromosomal rearrangement chr 1 (sample 22)

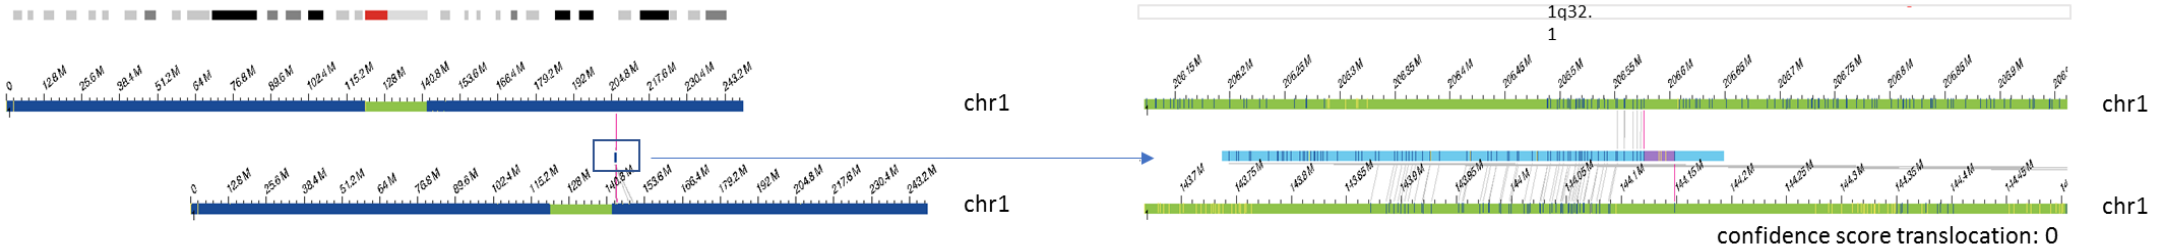

### B) Intrachromosomal rearrangement chr 9 (sample 11)

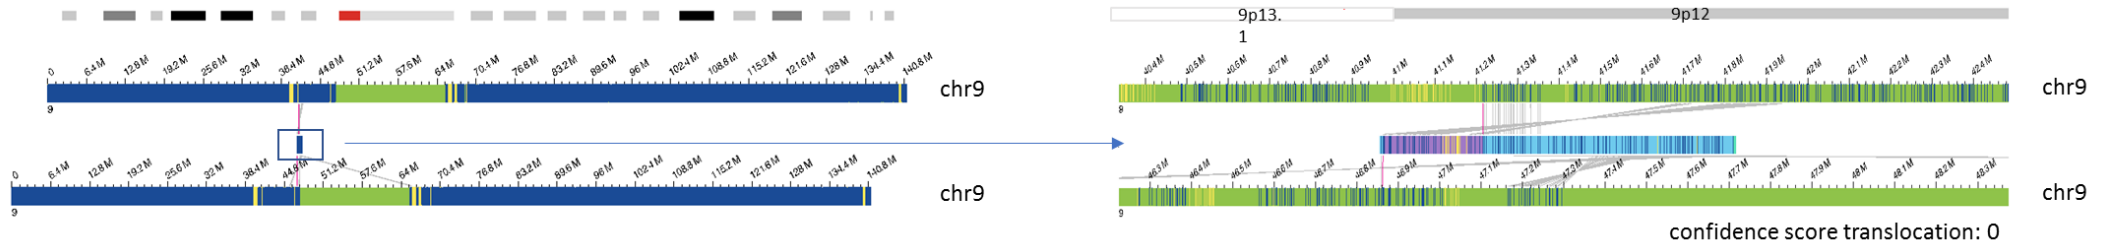

### Figure S3 Potential mapping artifacts.

This figure shows two different rearrangements called in two different samples that likely derive from mapping difficulties. A) Intrachromosomal rearrangement in chr1, B) Intrachromosomal rearrangement in chr9. In both samples, the rearrangement breakpoints occur in highly repetitive regions, often in close proximity to the centromere. The left side of each subfigure shows the whole chromosome view of the respective translocation, whereas the right side shows the zoom-in of the corresponding molecule map. The many different connecting lines between the labels in the reference genome map and the samples' genome map let assume that mapping of highly repetitive regions leads to false positive calls.

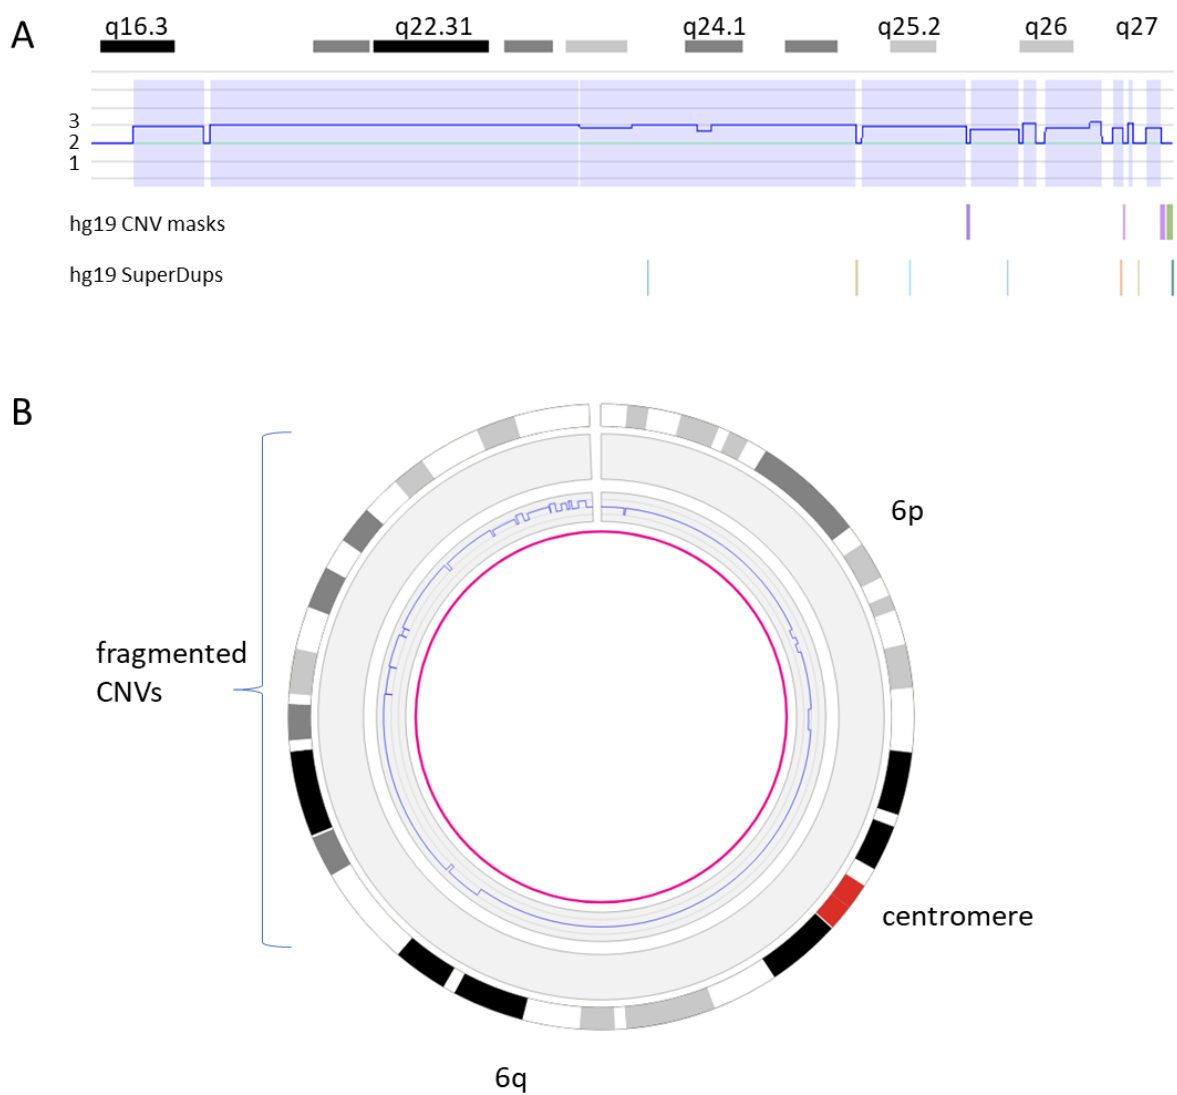

**Figure S4. Representative example of fragmented CNVs.**

This figure shows an example of a large CNV which is a consequence of a Robertsonian translocation.

However, instead of having one call of a large CNV, several smaller CNVs are called. A) CNV coverage plot of 6q16.3q27 region. B) Circos plot of the entire chromosome 6.

### Deletion

Sample 1: 8p22p21.3(18825888\_19364764)x1

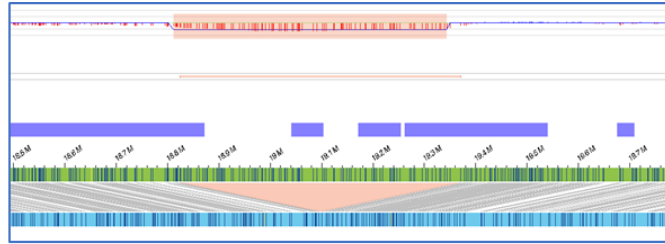

### Duplication

Sample 7: 3q29(194349341\_194988874)x3

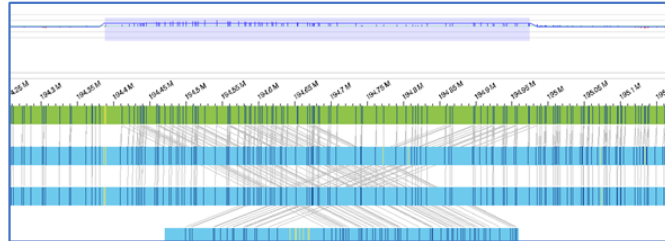

### Inversion

Sample 15:  
inv(13)(q12q22)

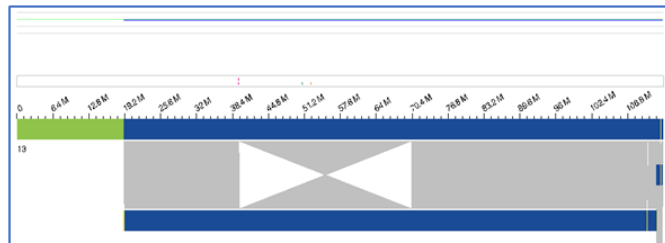

### Translocation balanced

Sample 14:  
t(3;6)(q11.2;q13)

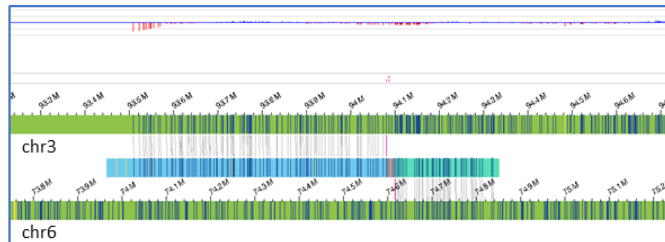

### Translocation unbalanced

Sample 26:  
t(12;20)(p13.32;p12.3),  
12p13.33p13.32 loss, 20p13p12.3 gain

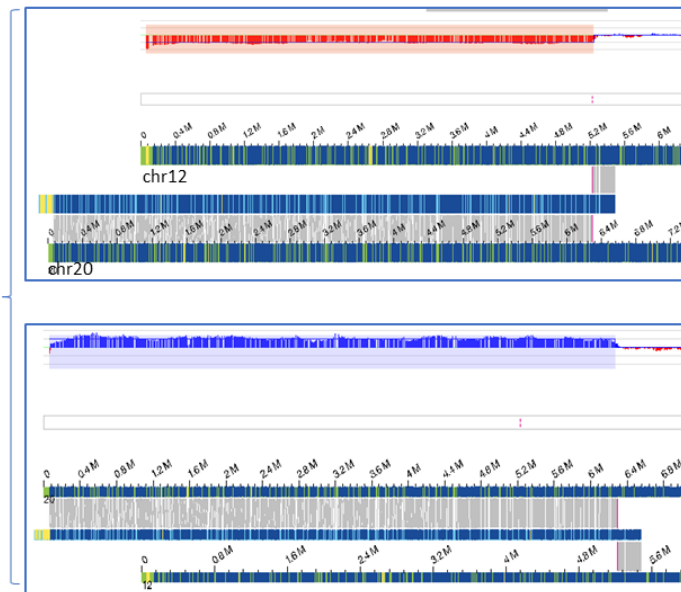

Figure S5 (1/2). Representation of different chromosomal abnormalities.

This figure shows an example of each type of chromosomal aberration that was detected in this study. All aberrations shown are described in detail in Table S1.



### Isochromosome

Sample 77:  
15q11.2q13.2 gain (4x)  
15q13.3 gain (3x)

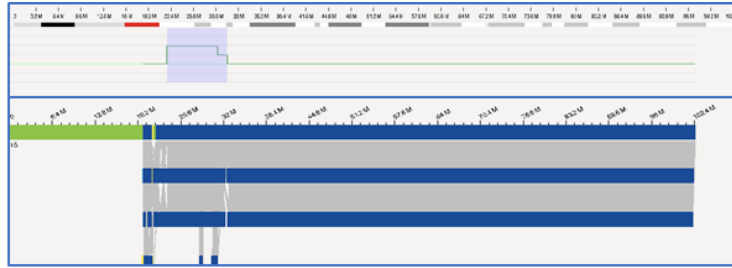

### Ring chromosome

Sample 39:  
r(X)(p11.21q21.1)

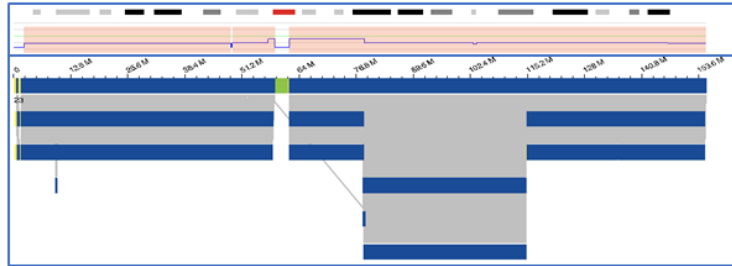

### Complex rearrangement

Sample 66:  
3p14.1(65238298\_68667113)x1  
3p13(70127345\_73724765)x1  
3p12.1(83784489\_85467284)x1  
3q11.2(97180779\_97270083)x1

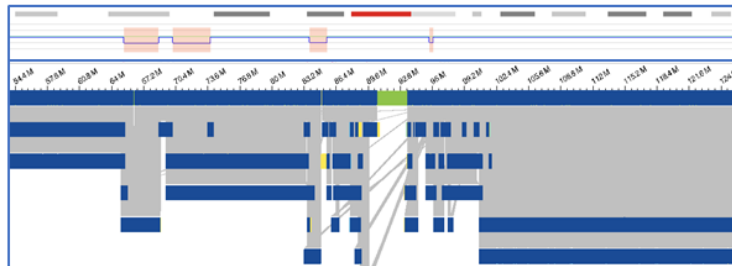

### Aneuploidy

Sample 24:  
trisomy 21 via Robertsonian translocation

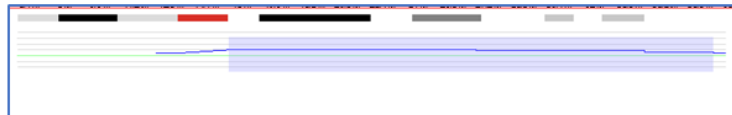

### Large terminal deletion

Sample 41:  
del(9)(p23pter)

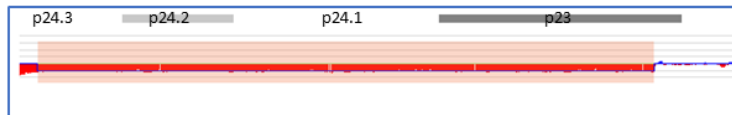

### Large duplication

Sample 60:  
8p23.1p12 gain

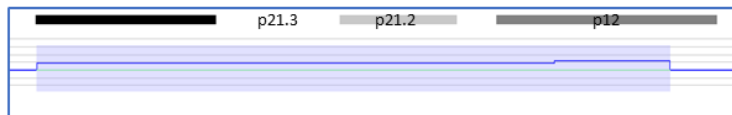

Figure S5 (continued 2/2). Representation of different chromosomal abnormalities.

This figure shows an example of each type of chromosomal aberration that was detected in this study. All aberrations shown are described in detail in Table S1.

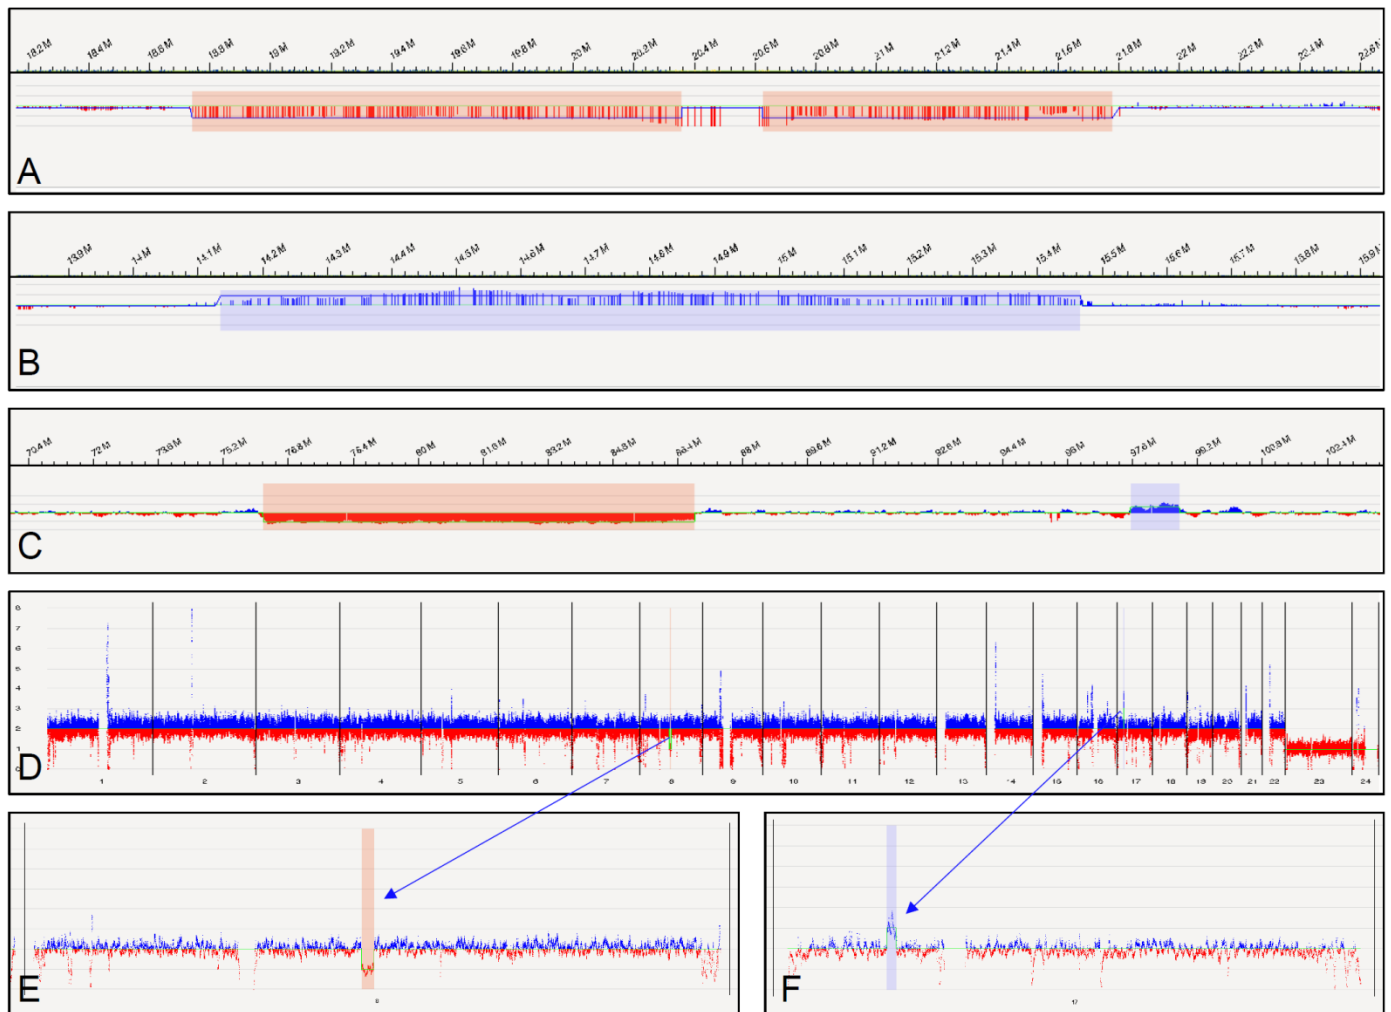

**Figure S6. Representative CNV profiles obtained with optical genome mapping, for different samples.**

A) Sample 2. Loss of 22q11.21(18645354\_21465660). B) Sample 8. Gain of 17p12(14087934\_15436895). C) Sample 70. Loss of 6q14.1q14.3(76385698\_86884355), and gain of 6q16.1(97661978\_98726638). D) Genome-wide CNV view (available in Bionano Solve v1.5) of sample 73 with E) chromosome 8 highlighted (showing a deletion) and F) chromosome 17 highlighted (showing a duplication). Blue: gains, Red: losses.

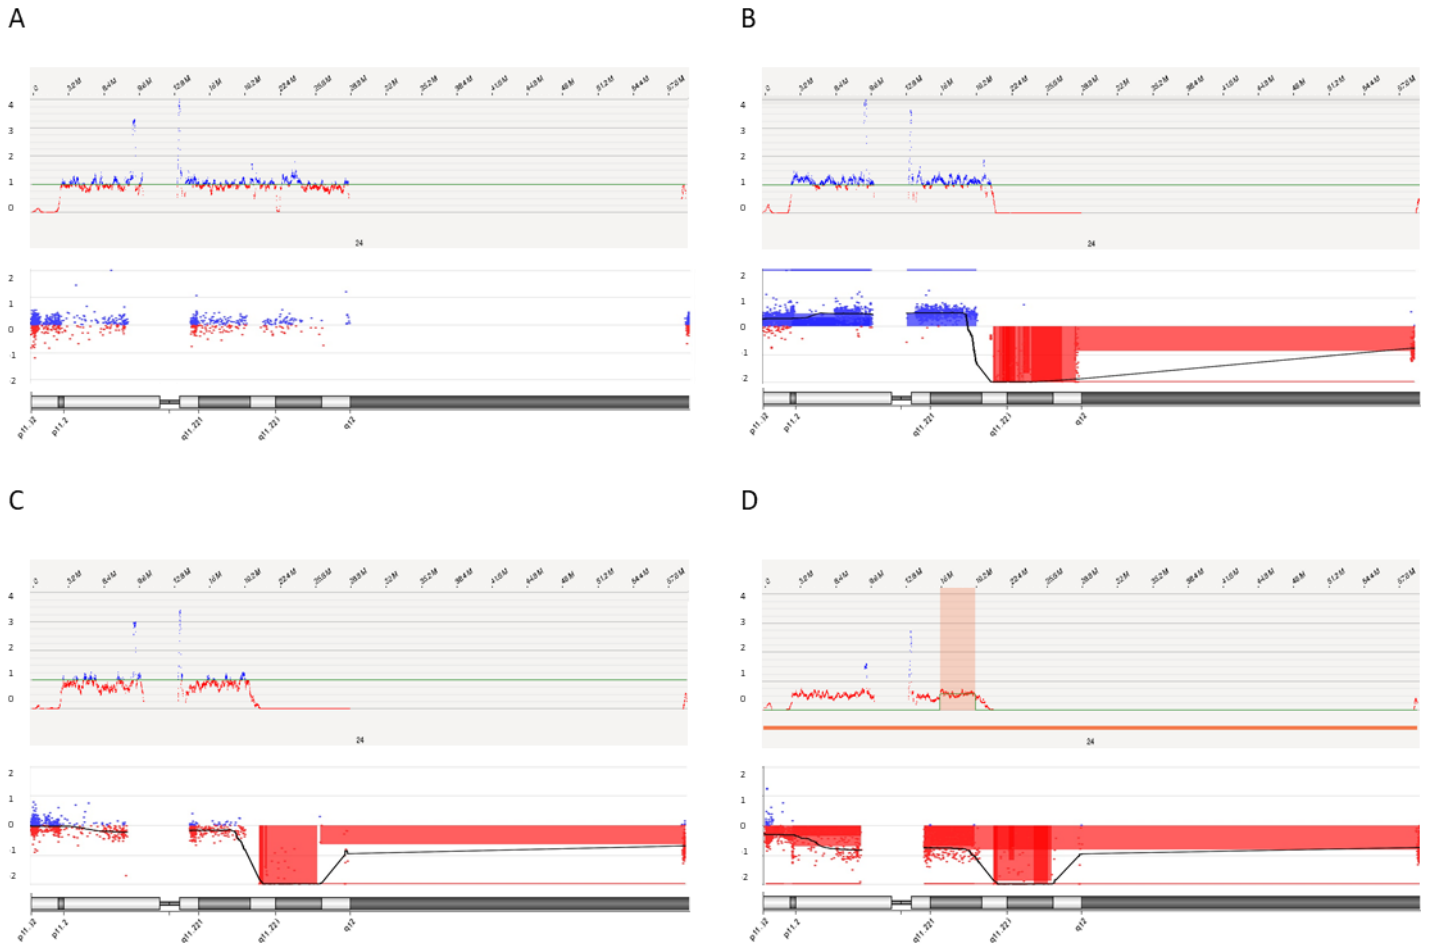

**Figure S7: Isodicentric Y-chromosomes.**

Optical genome mapping CNV profile (top) and CNV-microarray CNV profile (bottom) of Y-chromosomes of samples 80 (normal chrY, A), sample 55 (B), sample 57 (C) and sample 79 (D). The chromosomal position is given on top, the corresponding chromosome banding below each CNV-microarray profile. Sample 27 is not shown here because it was analyzed with a different CNV-microarray platform.

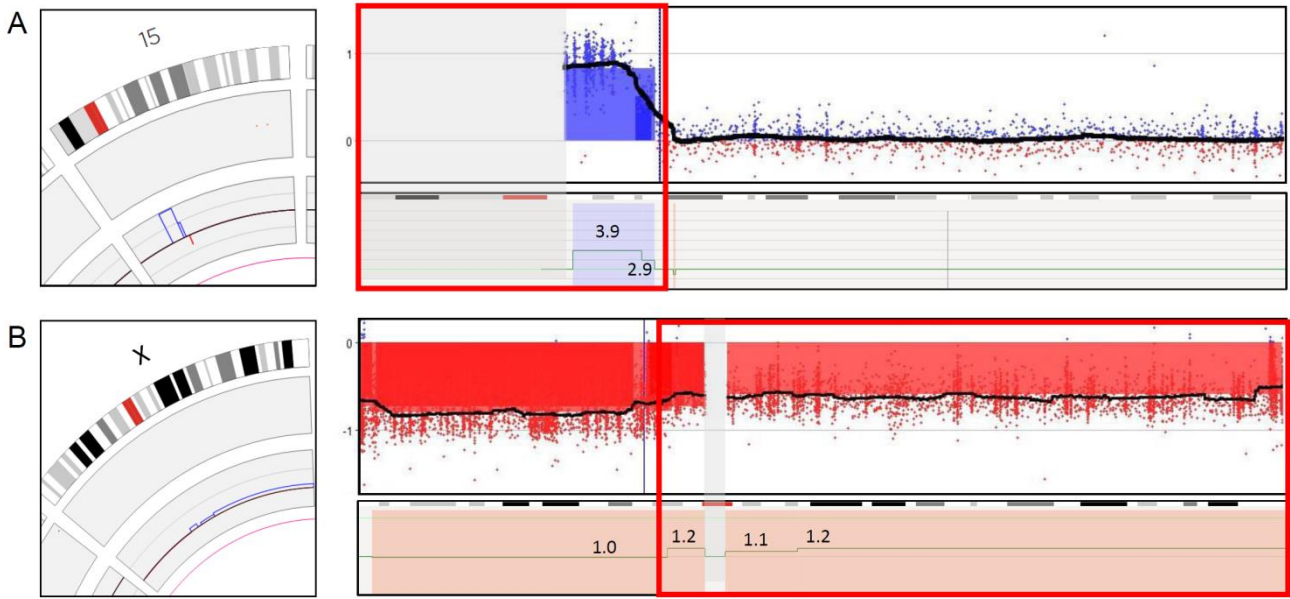

**Figure S8. Optical genome mapping and CNV-microarray profiles for isochromosomes 15 and X.**

A) Sample 77 (ish idic(15)(D15Z1+,SNRPN++,D15Z1+)). Left: Circos plot showing an abnormal CNV profile on chromosome 15. Top right: CNV-microarray data showing a gain on chr15. Bottom right: optical mapping data, showing a CNV profile that is nearly identical to the CNV-microarray profile. Numbers present fractional copy numbers. B) Sample 78 (46,X,idic(X)(p11.21)). Left: Circos plot showing a CNV baseline suggesting one copy of chromosome X (compared to the CNV line of chr22 partially shown on the left side). Additionally, the CNV profile shows a mosaic “gain” (compared to the baseline) on part of the chrX p-arm and the whole q-arm. Top right: CNV-microarray data showing a global loss on chrX (compared to a 46,XX control sample). However, the degree of loss varies within the chromosome consistent with a mosaic 45,X/46,X,idic(X)(p11.21) karyotype. Bottom right: optical mapping data showing a CNV profile that is nearly identical to the CNV-microarray profile. Numbers present fractional copy numbers. Red box shows parts of the chromosome 15 and X respectively that make up the iso-chromosomes. Grey box indicates the centromere (15 and X) and/or acrocentric p-arm (15).

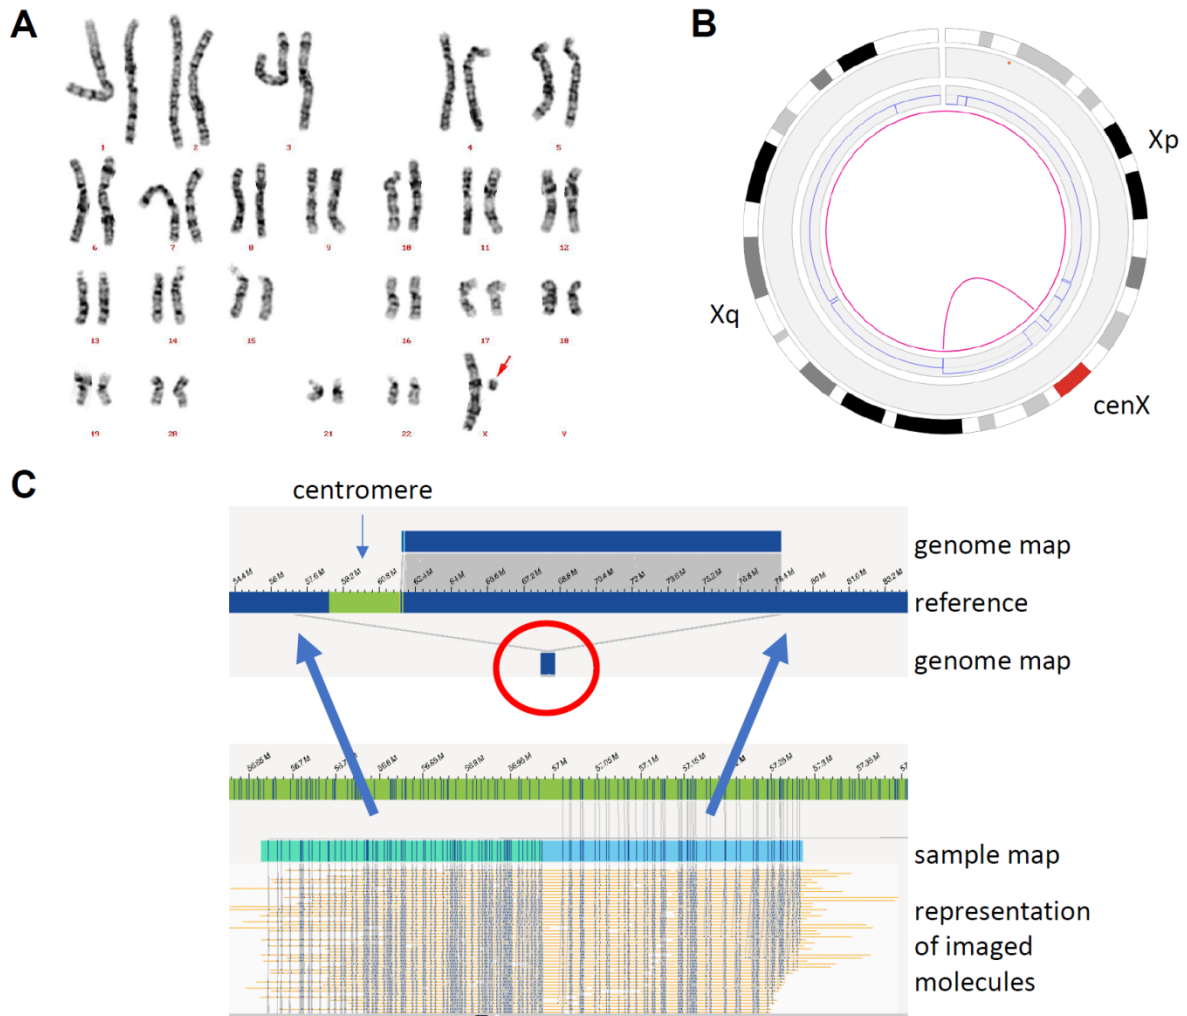

**Figure S9. Small ring chromosome X.**

A) Karyogram of sample 39. The red arrow is pointing towards the small X ring chromosome. B) Circos-plot (of chromosome X only) of sample 39. The pink line in the center of the circosplot is indicating the presence of the ring chromosome (called as an intrachromosomal translocation). C) Different genome maps (dark blue bars on top and below the reference) indicating the presence of the ring chromosome. The individual molecules for the genome map below the reference (highlighted by a red circle) are shown at the bottom of this figure. The left part of these molecules (light green bar) map to a region upstream of the centromere, whereas the right part of the same molecules (light blue bar) map to a region downstream of the centromere.

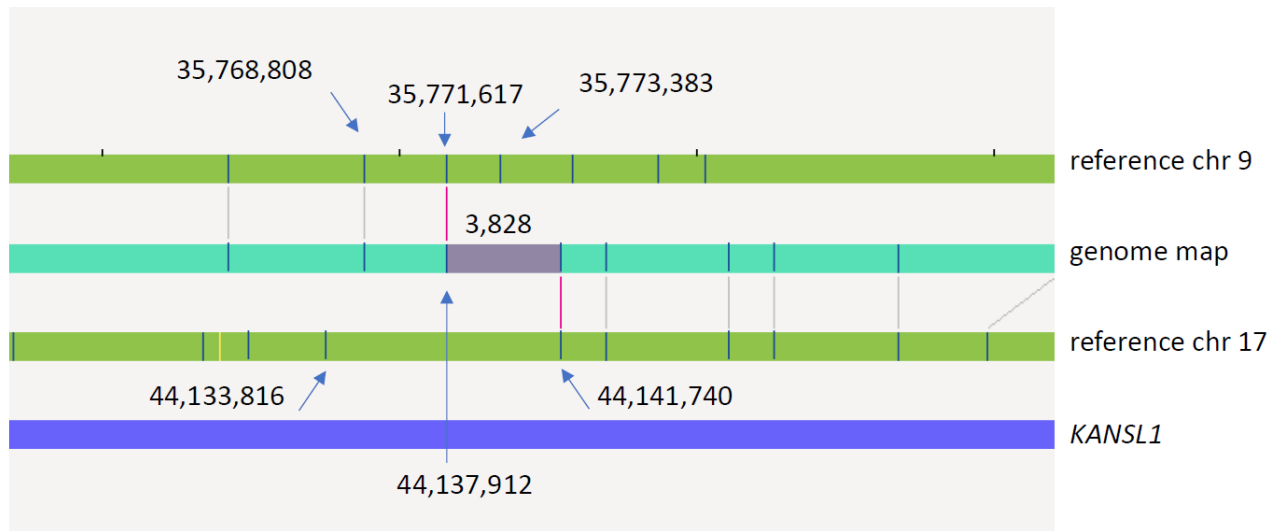

**Figure S10. Optical genome mapping breakpoint detection for translocation  $t(9;17)(p13;q21)$ , disrupting the gene *KANSL1*.**

The two green bars represent the references of chromosomes 9 and 17, respectively. The mint bar in between represents the genome map of the translocation. The blue bar underneath represents the *KANSL1* gene. Small vertical black lines represent identified labels, and the red vertical lines indicate the translocation breakpoints, with an uncertain region of 3,828 bp in between shown in purple. The breakpoints are located between basepair-positions 35,771,617 and 35,773,383 on chromosome 9, and between 44,137,912 and 44,141,740 on chromosome 17.

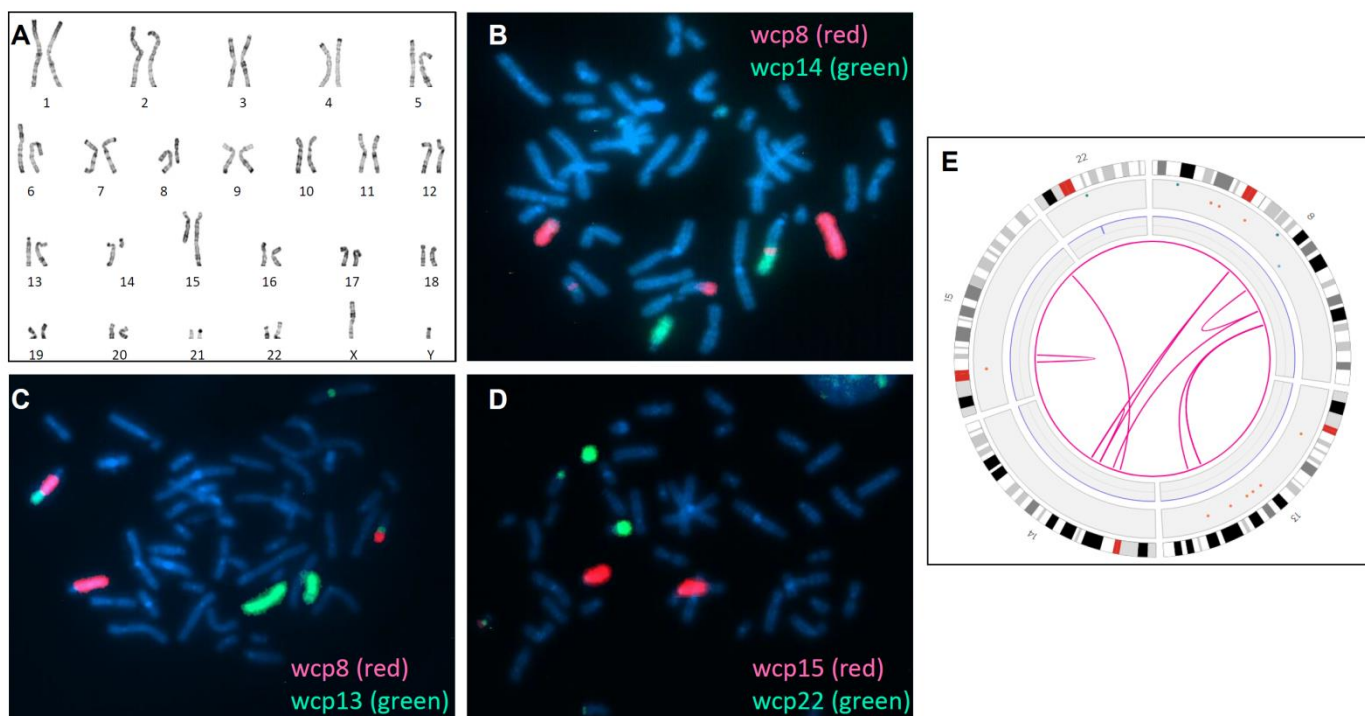

**Figure S11. Complex sample 52.**

A) Karyotype of sample 52, interpreted as 46,XY,der(8)t(8;22)(q12;q12),der(13)t(8;13)(q31;q23),der(14)t(14;15)(q11.2;q25),der(15)t(14;15)(q21;q24),der(22)t(13;22)(q31.1;p11.2). B) FISH of sample 52, using FISH probes wcp8 (red), wcp14 (green). C) FISH of sample 52, using FISH probes wcp8 (green), wcp13 (red). D) FISH of sample 52, using FISH probes wcp15 (green), wcp22 (red). E) Optical mapping circos plot, showing different translocations t(8;13), t(8;14), t(14,15), and intrachromosomal translocations on chr 8 and chr 15.

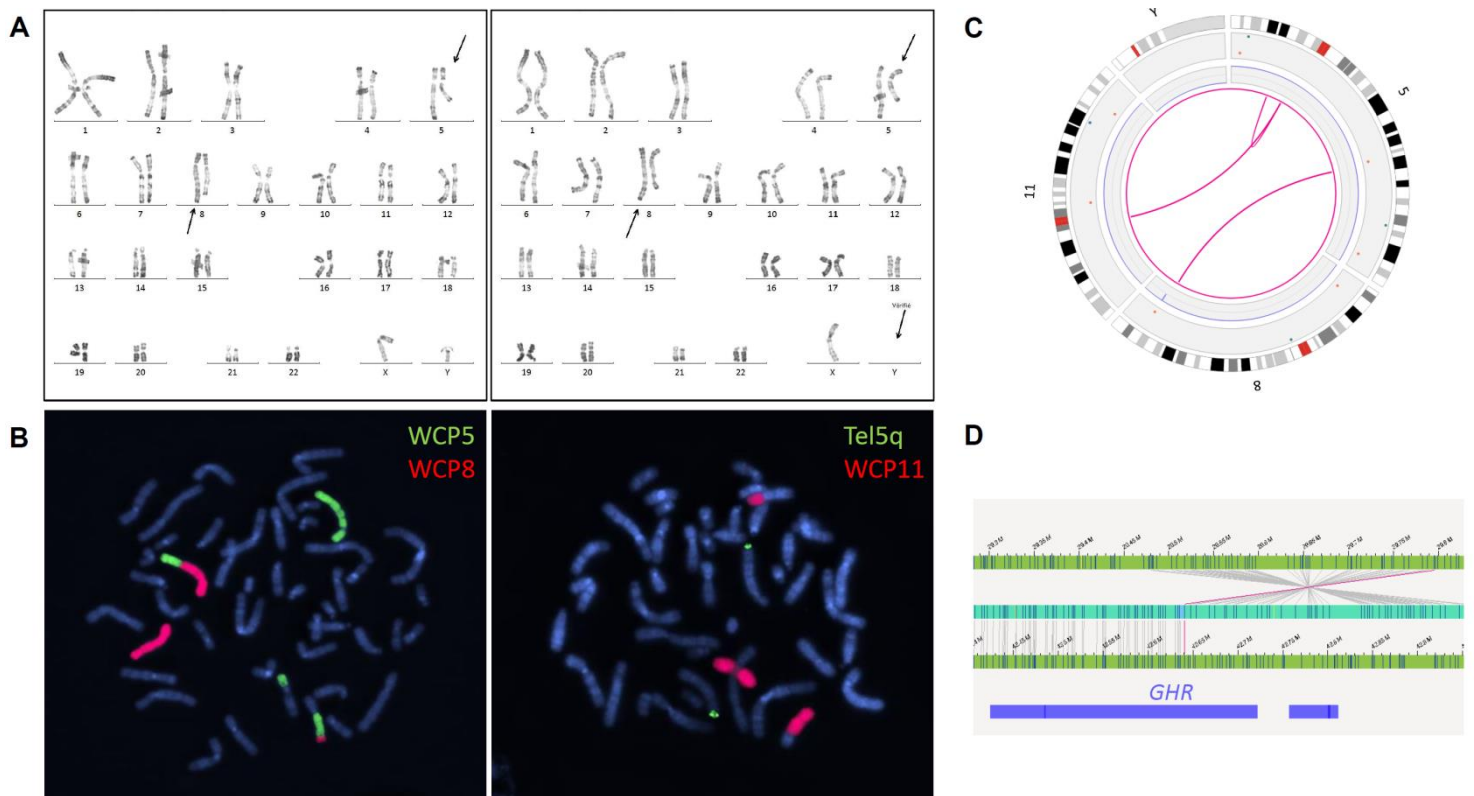

Figure S12: Complex sample 55.

- A) Karyotype of sample 55, interpreted as 46,X, idic(Y)(q11.22), t(5;8)(q23;q24), t(5;11)(p12;p13)[32/50] / 45,X, t(5;8)(q23;q24), t(5;11)(p12;p13)[10/50] / 47,XY, idic(Y)(q11.22), t(5;8)(q23;q24), t(5;11)(p12;p13) [8/50]. B) FISH of sample 55, showing the translocations t(5;8) (left) and t(5;11) (right). C) Optical mapping circos plot of sample 55, showing the translocations t(5;8), t(5;11) and an intrachromosomal translocation on chromosome 5. D) Bionano genome maps, showing the intrachromosomal translocation on chromosome 5, which is disrupting the gene *GHR*.



**Table S1.** Comparison of previous diagnostic findings with optical genome mapping results.

*Provided in Excel sheet format*

Table S2. Technical performance of optical genome mapping.

| Sample                    | Starting material        | Total DNA<br>>=150 kbp (Gbp) | Avg N50<br>>=150kbp (Mbp) | Avg N50<br>>=20kbp (Mbp) | Map rate<br>(>= 150 kbp) | Effective<br>coverage (x) | Avg label density<br>(per 100kbp) |
|---------------------------|--------------------------|------------------------------|---------------------------|--------------------------|--------------------------|---------------------------|-----------------------------------|
| 1                         | EDTA blood               | 1 320                        | 0,24                      | 0,12                     | 69%                      | 286                       | 15,69                             |
| 2                         | EDTA blood               | 1 332                        | 0,26                      | 0,15                     | 78%                      | 323                       | 15,19                             |
| 3                         | EDTA blood               | 1 302                        | 0,26                      | 0,13                     | 57%                      | 233                       | 17,88                             |
| 4                         | EDTA blood               | 1 305                        | 0,24                      | 0,13                     | 58%                      | 243                       | 17,14                             |
| 5                         | EDTA blood               | 1 347                        | 0,26                      | 0,21                     | 87%                      | 368                       | 15,20                             |
| 6                         | EDTA blood               | 811                          | 0,21                      | 0,08                     | 43%                      | 110                       | 15,28                             |
| 7                         | EDTA blood               | 807                          | 0,21                      | 0,10                     | 55%                      | 140                       | 15,34                             |
| 8                         | EDTA blood               | 867                          | 0,24                      | 0,12                     | 60%                      | 163                       | 15,19                             |
| 9                         | EDTA blood               | 816                          | 0,25                      | 0,17                     | 67%                      | 167                       | 15,38                             |
| 10                        | EDTA blood               | 824                          | 0,22                      | 0,11                     | 68%                      | 175                       | 15,25                             |
| 11                        | EDTA blood               | 840                          | 0,24                      | 0,13                     | 67%                      | 176                       | 15,40                             |
| 12                        | EDTA blood               | 534                          | 0,33                      | 0,33                     | 40%                      | 69                        | 16,16                             |
| 13                        | EDTA blood               | 814                          | 0,24                      | 0,15                     | 79%                      | 200                       | 15,19                             |
| 14                        | Hep. Blood               | 801                          | 0,24                      | 0,14                     | 66%                      | 162                       | 15,25                             |
| 15                        | Hep. Blood               | 655                          | 0,24                      | 0,15                     | 63%                      | 124                       | 14,40                             |
| 16                        | Hep. Blood               | 821                          | 0,22                      | 0,14                     | 72%                      | 175                       | 13,76                             |
| 17                        | Hep. Blood               | 813                          | 0,20                      | 0,12                     | 63%                      | 149                       | 13,27                             |
| 18                        | Hep. Blood               | 823                          | 0,20                      | 0,12                     | 64%                      | 157                       | 14,28                             |
| 19                        | Hep. Blood               | 825                          | 0,22                      | 0,13                     | 69%                      | 169                       | 14,21                             |
| 20                        | Hep. Blood               | 817                          | 0,19                      | 0,12                     | 65%                      | 150                       | 12,97                             |
| 21                        | Hep. Blood               | 832                          | 0,21                      | 0,13                     | 67%                      | 162                       | 13,83                             |
| 22                        | Amniotic fluid           | 200                          | 0,30                      | 0,30                     | 60%                      | 38                        | 15,40                             |
| 23                        | Amniotic fluid           | 812                          | 0,27                      | 0,21                     | 75%                      | 177                       | 13,47                             |
| 24                        | Chorionic villi          | 826                          | 0,25                      | 0,18                     | 73%                      | 176                       | 13,74                             |
| 25                        | Amniotic fluid           | 850                          | 0,26                      | 0,20                     | 72%                      | 177                       | 13,26                             |
| 26                        | Amniotic fluid           | 802                          | 0,24                      | 0,18                     | 88%                      | 220                       | 15,33                             |
| 27                        | Amniotic fluid           | 801                          | 0,30                      | 0,22                     | 85%                      | 214                       | 15,39                             |
| 28                        | Amniotic fluid           | 849                          | 0,26                      | 0,17                     | 78%                      | 186                       | 12,77                             |
| 29                        | Chorionic villi          | 617                          | 0,28                      | 0,21                     | 90%                      | 173                       | 14,96                             |
| 30                        | Amniotic fluid           | 842                          | 0,33                      | 0,27                     | 89%                      | 242                       | 14,72                             |
| 31                        | Chorionic villi          | 820                          | 0,27                      | 0,21                     | 88%                      | 223                       | 14,40                             |
| 32                        | Amniotic fluid           | 817                          | 0,33                      | 0,26                     | 90%                      | 228                       | 14,97                             |
| 33                        | Chorionic villi          | 802                          | 0,29                      | 0,20                     | 84%                      | 219                       | 14,97                             |
| 34                        | Lymphoblastoid cell line | 839                          | 0,32                      | 0,21                     | 86%                      | 224                       | 15,15                             |
| 35                        | Hep. Blood               | 814                          | 0,27                      | 0,21                     | 87%                      | 218                       | 14,37                             |
| 36                        | Hep. Blood               | 845                          | 0,30                      | 0,25                     | 89%                      | 233                       | 14,91                             |
| 37                        | Hep. Blood               | 809                          | 0,25                      | 0,10                     | 71%                      | 178                       | 14,74                             |
| 38                        | Hep. Blood               | 857                          | 0,27                      | 0,22                     | 89%                      | 233                       | 14,37                             |
| 39                        | Hep. Blood               | 855                          | 0,25                      | 0,17                     | 86%                      | 228                       | 14,01                             |
| 40                        | Hep. Blood               | 810                          | 0,24                      | 0,17                     | 77%                      | 189                       | 12,92                             |
| 41                        | Hep. Blood               | 811                          | 0,21                      | 0,13                     | 73%                      | 184                       | 14,23                             |
| 42                        | Hep. Blood               | 823                          | 0,24                      | 0,18                     | 82%                      | 208                       | 14,19                             |
| 43                        | EDTA blood               | 499                          | 0,26                      | 0,17                     | 87%                      | 135                       | 14,50                             |
| 44                        | EDTA blood               | 506                          | 0,26                      | 0,12                     | 82%                      | 130                       | 15,11                             |
| 45                        | EDTA blood               | 503                          | 0,25                      | 0,17                     | 85%                      | 134                       | 15,27                             |
| 46                        | EDTA blood               | 495                          | 0,24                      | 0,16                     | 78%                      | 122                       | 14,96                             |
| 47                        | EDTA blood               | 488                          | 0,23                      | 0,10                     | 70%                      | 107                       | 15,58                             |
| 48                        | EDTA blood               | 486                          | 0,30                      | 0,25                     | 90%                      | 137                       | 14,60                             |
| 49                        | Lymphoblastoid cell line | 376                          | 0,28                      | 0,20                     | 79%                      | 95                        | 15,79                             |
| 50                        | Lymphoblastoid cell line | 328                          | 0,28                      | 0,20                     | 70%                      | 73                        | 16,38                             |
| 51                        | Lymphoblastoid cell line | 484                          | 0,29                      | 0,20                     | 64%                      | 98                        | 15,74                             |
| 52                        | Lymphoblastoid cell line | 348                          | 0,29                      | 0,20                     | 78%                      | 87                        | 15,71                             |
| 53                        | Lymphoblastoid cell line | 495                          | 0,28                      | 0,19                     | 73%                      | 115                       | 15,42                             |
| 54                        | Lymphoblastoid cell line | 345                          | 0,27                      | 0,16                     | 75%                      | 82                        | 15,25                             |
| 55                        | EDTA blood               | 541                          | 0,29                      | 0,20                     | 85%                      | 144                       | 14,47                             |
| 56                        | EDTA blood               | 519                          | 0,26                      | 0,17                     | 88%                      | 142                       | 14,51                             |
| 57                        | EDTA blood               | 324                          | 0,22                      | 0,13                     | 75%                      | 75                        | 14,78                             |
| 58                        | EDTA blood               | 328                          | 0,23                      | 0,14                     | 84%                      | 85                        | 15,10                             |
| 59                        | EDTA blood               | 324                          | 0,26                      | 0,17                     | 74%                      | 75                        | 15,17                             |
| 60                        | EDTA blood               | 481                          | 0,29                      | 0,22                     | 75%                      | 113                       | 15,27                             |
| 61                        | EDTA blood               | 333                          | 0,22                      | 0,10                     | 68%                      | 71                        | 15,05                             |
| 62                        | EDTA blood               | 492                          | 0,29                      | 0,13                     | 74%                      | 113                       | 15,90                             |
| 63                        | EDTA blood               | 496                          | 0,25                      | 0,16                     | 84%                      | 129                       | 15,04                             |
| 64                        | EDTA blood               | 504                          | 0,28                      | 0,20                     | 90%                      | 143                       | 15,44                             |
| 65                        | EDTA blood               | 346                          | 0,27                      | 0,17                     | 89%                      | 95                        | 15,13                             |
| 66                        | EDTA blood               | 380                          | 0,30                      | 0,19                     | 83%                      | 102                       | 16,28                             |
| 67                        | EDTA blood               | 353                          | 0,31                      | 0,25                     | 90%                      | 100                       | 16,83                             |
| 68                        | EDTA blood               | 371                          | 0,35                      | 0,27                     | 81%                      | 96                        | 17,17                             |
| 69                        | EDTA blood               | 480                          | 0,32                      | 0,25                     | 85%                      | 129                       | 16,46                             |
| 70                        | EDTA blood               | 400                          | 0,36                      | 0,36                     | 89%                      | 111                       | 14,24                             |
| 71                        | EDTA blood               | 400                          | 0,31                      | 0,31                     | 87%                      | 109                       | 14,47                             |
| 72                        | EDTA blood               | 1 311                        | 0,22                      | 0,12                     | 50%                      | 208                       | 14,88                             |
| 73                        | EDTA blood               | 400                          | 0,32                      | 0,32                     | 84%                      | 105                       | 15,75                             |
| 74                        | EDTA blood               | 911                          | 0,25                      | 0,15                     | 38%                      | 109                       | 22,36                             |
| 75                        | EDTA blood               | 400                          | 0,28                      | 0,28                     | 86%                      | 108                       | 15,45                             |
| 76                        | EDTA blood               | 400                          | 0,30                      | 0,30                     | 81%                      | 102                       | 15,78                             |
| 77                        | EDTA blood               | 488                          | 0,34                      | 0,28                     | 87%                      | 134                       | 14,82                             |
| 78                        | EDTA blood               | 436                          | 0,27                      | 0,18                     | 91%                      | 122                       | 15,06                             |
| 79                        | EDTA blood               | 483                          | 0,32                      | 0,24                     | 87%                      | 132                       | 14,92                             |
| 80                        | EDTA blood               | 424                          | 0,31                      | 0,25                     | 92%                      | 120                       | 15,06                             |
| 81                        | EDTA blood               | 483                          | 0,31                      | 0,24                     | 93%                      | 140                       | 15,62                             |
| 82                        | EDTA blood               | 449                          | 0,29                      | 0,20                     | 91%                      | 127                       | 15,56                             |
| 83                        | EDTA blood               | 411                          | 0,27                      | 0,17                     | 86%                      | 110                       | 15,94                             |
| 84                        | EDTA blood               | 406                          | 0,27                      | 0,13                     | 88%                      | 110                       | 15,29                             |
| 85                        | Lymphoblastoid cell line | 481                          | 0,29                      | 0,11                     | 77%                      | 117                       | 15,30                             |
| <b>Average</b>            |                          | 655                          | 0,27                      | 0,18                     | 77%                      | 152                       | 15,13                             |
| <b>Max value</b>          |                          | 1 347                        | 0,36                      | 0,36                     | 93%                      | 368                       | 22,36                             |
| <b>Min value</b>          |                          | 200                          | 0,19                      | 0,08                     | 38%                      | 38                        | 12,77                             |
| <b>Standard deviation</b> |                          | 270                          | 0,04                      | 0,06                     | 12%                      | 59                        | 1,21                              |

**Table S3.** Overall numbers of variants per sample.

*Provided in Excel sheet format*

Table S4. SV and CNV statistics per size range.

**a. Size distribution of SV calls for the cohort**

|                 | Number of rare SVs in each size category |              |            |            |            |
|-----------------|------------------------------------------|--------------|------------|------------|------------|
|                 | Total rare SVs                           | 0-20kb       | 20-100kb   | 100-500kb  | >500kb     |
| All chromosomes | 6785 (100%)                              | 5996 (88.4%) | 423 (6.2%) | 160 (2.4%) | 206 (3.0%) |

**b. CNV size distribution in the total cohort (initial filter-setups: non-masked CNVs only and excluding those with CN=2)**

|                 | Number of CNV calls in each size category |               |               |               |             |
|-----------------|-------------------------------------------|---------------|---------------|---------------|-------------|
|                 | Total                                     | < 0.5Mb       | 0.5-1.0Mb     | 1-5Mb         | >5Mb        |
| All chromosomes | 942 (100%)                                | 471/942 (50%) | 246/942 (26%) | 174/942 (18%) | 51/942 (6%) |
| Autosomes only  | 895 (100%)                                | 463/895 (52%) | 241/895 (27%) | 162/895 (18%) | 29/895 (3%) |

**c. CNV size distribution in the total cohort (additional filtering: excluding deletions with fractional CN >1.2 and duplications with CN < 2.8)**

|                 | Number of CNV calls in each size category |                 |                |                |               |
|-----------------|-------------------------------------------|-----------------|----------------|----------------|---------------|
|                 | Total                                     | < 0.5Mb         | 0.5-1.0Mb      | 1-5Mb          | >5Mb          |
| All chromosomes | 366 (100%)                                | 224/366 (61.2%) | 61/366 (16.7%) | 37/366 (10.1%) | 44/366 (12%)  |
| Autosomes only  | 324 (100%)                                | 218/324 (67.3%) | 57/324 (17.6%) | 25/324 (7.7%)  | 24/324 (7.4%) |

**Table S5.** Detection rate of chromosomal aberrations, by each pipeline, according to their type.

| <b>Aberration type</b>            | <b>SV tool call</b>                      | <b>CNV tool call</b> | <b>Only called by one tool</b> | <b>Called by both tools</b> | <b>Global rate of detection</b> |      |
|-----------------------------------|------------------------------------------|----------------------|--------------------------------|-----------------------------|---------------------------------|------|
| Aneuploidies (n=7)                | NA                                       | 7/7 (100%)           | 7/7 (100%)                     | NA                          | 100%                            |      |
| Unbalanced structural aberrations | Microdeletions and duplications (n=34)   | 27/34 (79%)          | 27/34 (79%)                    | 14/34 (41%)                 | 20/34 (59%)                     | 100% |
|                                   | Large CNV losses and gains (n=5)*        | 2/5 (40%)            | 5/5 (100%)                     | 3/5 (60%)                   | 2/5 (40%)                       | 100% |
|                                   | Unbalanced translocation (n=7)           | 4/7 (57%)            | 5/7 (51%)                      | 3/7 (43%)                   | 4/7 (57%)                       | 100% |
|                                   | Unbalanced insertions (n=2)              | 2/2 (100%)           | 2/2 (100%)                     | 0/2 (0%)                    | 2/2 (100%)                      | 100% |
|                                   | Ring chromosomes (n=1)                   | 1/1 (100%)           | 1/1 (100%)                     | 0/1 (0%)                    | 1/1 (100%)                      | 100% |
|                                   | Isochromosomes (n=6)                     | 0/6 (0%)             | 6/6 (100%)                     | 6/6 (100%)                  | 0/6 (0%)                        | 100% |
|                                   | complex chromosomal rearrangements (n=4) | 4/4 (100%)           | 2/4 (50%)                      | 2/4 (50%)                   | 2/4 (50%)                       | 100% |
| Balanced structural aberrations   | Balanced translocation (n=27)            | 27/27 (100%)         | NA                             | 27/27 (100%)                | NA                              | 100% |
|                                   | Inversions (n=6)                         | 6/6 (100%)           | NA                             | 6/6 (100%)                  | NA                              | 100% |

\*this includes terminal aberrations that are currently not called by the SV pipeline

NA: not applicable

**Table S6.** Comparison of capabilities and limitations of optical genome mapping versus conventional cytogenetic methods, karyotyping and CNV-microarray, in detecting different types of chromosomal aberrations.

| Aberration type                       | Detection of aberration            |                                |                        | Localization of aberration         |                                |                        |
|---------------------------------------|------------------------------------|--------------------------------|------------------------|------------------------------------|--------------------------------|------------------------|
|                                       | Standard of care genome-wide tests |                                | Optical genome mapping | Standard of care genome-wide tests |                                | Optical genome mapping |
|                                       | CNV-microarray                     | Karyotyping                    |                        | CNV-microarray                     | Karyotyping                    |                        |
|                                       | aberrations larger than 20-200 kb  | aberrations larger than 7-10Mb | aberrations >few kb    | aberrations larger than 20-200 kb  | aberrations larger than 7-10Mb | aberrations >few kb    |
| Aneuploidy                            | ✓                                  | ✓                              | ✓                      | ✗                                  | ✓                              | ✓                      |
| Unbalanced Robertsonian translocation | ✓                                  | ✓                              | ✓                      | ✗                                  | ✓                              | ✗                      |
| Balanced Robertsonian translocation   | ✗                                  | ✓                              | ✗                      | ✗                                  | ✓                              | ✗                      |
| Unbalanced reciprocal translocation   | ✓                                  | ✓                              | ✓                      | ✗                                  | ✓                              | ✓                      |
| Balanced reciprocal translocation     | ✗                                  | ✓                              | ✓                      | ✗                                  | ✓                              | ✓                      |
| Deletion                              | ✓                                  | ✓                              | ✓                      | ✗                                  | ✓                              | ✓                      |
| Insertion                             | unbalanced only                    | ✓                              | ✓                      | ✗                                  | ✓                              | ✓                      |
| Duplication                           | ✓                                  | ✓                              | ✓                      | ✗                                  | ✓                              | ✓                      |
| Inversion                             | ✗                                  | ✓                              | ✓                      | ✗                                  | ✓                              | ✓                      |
| Isochromosome                         | ✓                                  | ✓                              | ✓                      | ✗                                  | ✓                              | ✓                      |
| Ring chromosome                       | unbalanced only                    | ✓                              | ✓                      | ✗                                  | ✓                              | ✓                      |

**Table S7.** Concordance of all filtered SVs and CNVs between optical genome mapping and CNV-microarray.

| Sample ID | Bionano call |            |            |           |                   |                      | CNV-microarray call |           |           |                          |              | Result <sup>a</sup> |
|-----------|--------------|------------|------------|-----------|-------------------|----------------------|---------------------|-----------|-----------|--------------------------|--------------|---------------------|
|           | Bionano tool | Chr        | Start      | End       | Size (bp)         | Type                 | Chr                 | Start     | End       | Call size or # of probes | LogR         |                     |
| 56        | SV           | 4          | 161863865  | 161923311 | 59447             | duplication          | 4                   | 161869551 | 161869610 | 1 probe                  | 0,5          | Supported           |
|           | SV           | 10         | 81438916   | 81594303  | 137161            | deletion             | -                   | -         | -         | No probes                | -            | Inconclusive        |
|           | SV           | 16         | 34462037   | 34556454  | 94418             | duplication_inverted | 16                  | 34482042  | 34482101  | 2 probes                 | 0,5          | Supported           |
|           | SV           | 16         | 34462037   | 34578881  | 116845            | duplication_inverted | 16                  | 34565215  | 34565274  |                          | 0,5          | Supported           |
|           | SV           | 16         | 79404969   | 79430008  | 20599             | deletion             | 16                  | 79420905  | 79420964  | 1 probe                  | -0,76        | Supported           |
| 62        | SV           | 1          | 49908206   | 50001818  | 84129             | deletion             | 1                   | 49959780  | 49959839  | 1 probe                  | -0,92        | Supported           |
|           | SV           | 1          | 246313442  | 246520313 | 206871            | deletion             | 1                   | 246321447 | 246501692 | 180245 bp                | mean=-1,12   | Confirmed           |
|           | SV           | 2          | 233239437  | 233288334 | 27988             | deletion             | 2                   | 233270613 | 233270672 | 1 probe                  | -0,77        | Supported           |
|           | SV           | 5          | 120421707  | 120472623 | 43718             | deletion             | -                   | -         | -         | No probes                | -            | Inconclusive        |
|           | SV           | 9          | 71845510   | 71961535  | 116026            | duplication          | 9                   | 71846678  | 71846737  | 3 probes                 | 0,55         | Supported           |
|           | 9            |            |            |           |                   |                      | 71917699            | 71917758  | 0,39      |                          |              |                     |
| 9         | 71957664     |            |            |           |                   |                      | 71957723            | 0,57      |           |                          |              |                     |
| SV        | 18           | 65845905   | 65907488   | 49589     | deletion          | 18                   | 65891840            | 65891899  | 1 probe   | -0,54                    | Supported    |                     |
| 64        | CNV          | 7          | 76109311   | 76623844  | 514533            | deletion             | 7                   | 76139282  | 76558024  | 418743 bp                | mean=-0,85   | Confirmed           |
|           | CNV          | 8          | 2120483    | 2349321   | 228838            | deletion             | 8                   | 2206158   | 2206217   | 2 probes                 | 0,16         | Not supported       |
|           | 8            |            |            |           |                   |                      | 2308926             | 2308985   | -0,07     |                          |              |                     |
|           | SV           | 4          | 138246546  | 138337696 | 91151             | duplication          | 4                   | 138259451 | 138259510 | 2 probes                 | 0,42         | Supported           |
| 4         | 138324113    | 138324172  | 0,59       |           |                   |                      |                     |           |           |                          |              |                     |
| SV        | 9            | 32737531,7 | 32787627,8 | 36735     | deletion          | 9                    | 32759696            | 32759755  | 1 probe   | -1,02                    | Supported    |                     |
| 77        | CNV          | X          | 6503942    | 8131734   | 1627792           | duplication          | X                   | 6488721   | 8097511   | 1608791 bp               | mean=0,51    | Confirmed           |
|           | SV           | 4          | 139888286  | 139919269 | 23983             | deletion             | -                   | -         | -         | No probes                | -            | Inconclusive        |
|           | SV           | 11         | 85146480   | 85175179  | 23022             | deletion             | -                   | -         | -         | No probes                | -            | Inconclusive        |
|           | SV           | 14         | 86454708   | 86498388  | 31877             | deletion             | -                   | -         | -         | No probes                | -            | Inconclusive        |
| 78        | SV           | 1          | 22308530   | 22333055  | 23125             | deletion             | -                   | -         | -         | No probes                | -            | Inconclusive        |
|           | SV           | 2          | 55920504   | 55948466  | 27963             | duplication          | -                   | -         | -         | No probes                | -            | Inconclusive        |
|           | SV           | 2          | 131031140  | 131977013 | 74897             | deletion             | -                   | -         | -         | 10 probes                | mean=-0,01   | Not supported       |
|           | SV           | 2          | 241651052  | 241705013 | 53962             | duplication          | 2                   | 241687451 | 241687509 | 1 probe                  | 0,42         | Supported           |
|           | SV           | 3          | 100340351  | 100451628 | 111278            | duplication          | 3                   | 100360692 | 100360751 | 2 probes                 | 0,54         | Supported           |
|           | 3            |            |            |           |                   |                      | 100419565           | 100419624 | 0,61      |                          |              |                     |
|           | SV           | 3          | 165014055  | 165083895 | 42602             | deletion             | 3                   | 165065420 | 165065479 | 1 probe                  | 0,17         | Not supported       |
| SV        | 16           | 78037966   | 78081307   | 36813     | deletion          | -                    | -                   | -         | No probes | -                        | Inconclusive |                     |
| 79        | SV           | 2          | 130790519  | 131181302 | 390783            | deletion             | 2                   | 130928976 | 130929035 | 3 probes                 | 0,08         | Not supported       |
|           | 2            |            |            |           |                   |                      | 131015497           | 131015556 | -0,03     |                          |              |                     |
|           | 2            |            |            |           |                   |                      | 131084449           | 131084508 | -0,05     |                          |              |                     |
|           | SV           | 7          | 6118254    | 6146732   | 21897             | deletion             | 7                   | 6146033   | 6146092   | 1 probe                  | -0,06        | Not supported       |
|           | SV           | 9          | 105811280  | 105874071 | 55238             | deletion             | -                   | -         | -         | No probes                | -            | Inconclusive        |
|           | SV           | 10         | 5664747    | 5716793   | 52047             | duplication          | 10                  | 5684186   | 5684245   | 1 probe                  | 0,71         | Supported           |
|           | SV           | 10         | 12102683   | 12140526  | 37844             | duplication          | -                   | -         | -         | No probes                | -            | Inconclusive        |
|           | SV           | 11         | 49055393   | 49105125  | 26589             | deletion             | -                   | -         | -         | No probes                | -            | Inconclusive        |
|           | SV           | 13         | 38066960   | 38129134  | 50292             | deletion             | 13                  | 38106845  | 38106904  | 1 probe                  | -1,03        | Supported           |
|           | SV           | 14         | 74571941   | 74597810  | 25870             | duplication          | -                   | -         | -         | No probes                | -            | Inconclusive        |
|           | SV           |            |            |           |                   |                      | 14                  | 106665119 | 106665178 |                          | 0,5          |                     |
| 14        | 106716345    |            |            |           |                   |                      | 106716404           | 0,59      |           |                          |              |                     |
| SV        | 14           | 106774613  | 106774672  | 0,67      |                   |                      |                     |           |           |                          |              |                     |
| SV        | 15           | 86274566   | 86553109   | 278544    | duplication_split | 15                   | 86288646            | 86542460  | 253814 bp | mean=0,55                | Confirmed    |                     |
| SV        | X            | 23907510   | 23934260   | 26751     | duplication       | X                    | 23914694            | 23914753  | 1 probe   | 0,72                     | Supported    |                     |

<sup>a</sup> confirmed= the event is called by CNV-microarray ( $\geq 5$  consecutive deviating probes with a  $\text{LogR} > 0.25$  for duplication and  $< -0.25$  for deletion), supported= less than 5 probes but consistent  $\text{LogR}$  deviation (threshold  $> 0.25$  for dup  $< -0.25$  for del), inconclusive = uncovered region (no probes in the microarray at the respective region), Not supported = CNV-microarray and OM results are not matching
